# Supplementary material for: Evolutionarily conserved long-chain Acyl-CoA synthetases regulate membrane composition and fluidity
Source: eLife. 2019 Nov 26;8:e47733. doi: 10.7554/eLife.47733 (PMC6901333; doi:10.7554/eLife.47733)
Supplement: Figure 4—figure supplement 2—source data 1. [file elife-47733-fig4-figsupp2-data1.xlsx]

## Sheet: Fig_4_Fig_Suppl_2A
Lipidomics data used in Figure 4 – figure supplement 2A. Lipidomics of worms grown on NGM plates. For the heat map, the data was normalized to N2.
Heat map (PC)
						NGM
		N2 Control					acs-13 Control
FA 15:0		0.827613	0.761207	0.835201	0.797588		0.734316	0.703535	0.701316	0.782863
FA 16:0		1.05749	0.914172	1.06664	1.09934		0.78787	0.958583	1.051	1.02423
FA 16:1		1.22275	1.33811	1.13595	1.2		0.922704	1.02633	1.14388	1.09648
FA 17:0		1.10153	1.33826	1.23594	1.17595		1.31812	1.12893	1.0682	1.05362
FA 17:1		6.43599	6.36588	7.05043	6.47905		4.79793	5.66694	5.822	6.128
FA 18:0		0.940906	0.900855	0.931784	0.891342		1.33196	0.813191	1.01843	0.99178
FA 18:1		30.0808	31.2451	30.4784	32.3285		28.7122	27.87	29.2523	28.6324
FA 18:2		5.45673	4.61622	5.37869	5.94433		4.92892	5.75353	5.52016	5.03016
FA 18:3		3.68332	3.29658	3.82702	4.01849		3.10324	3.27981	3.67443	3.65708
FA 19:1		5.04143	4.87145	5.42435	4.92692		4.75678	5.13104	4.81895	5.03786
FA 20:2		0.193256	0.167914	0.165268	0.189118		0.195427	0.199149	0.15555	0.174175
FA 20:3		3.81636	3.69457	3.708	3.82654		3.75399	3.92306	3.91827	4.0497
FA 20:4		8.88319	9.18346	8.67276	8.93335		10.2673	10.3956	9.86045	10.1008
FA 20:5		31.2587	31.3062	30.0896	28.1895		34.3892	33.1503	31.9951	32.2409
SFA		3.92754	3.91449	4.06957	3.96422		4.17	3.6	3.84	3.85
MUFA		42.7809	43.8206	44.0891	44.9345		39.19	39.69	41.04	40.89
PUFA		53.2915	52.2649	51.8413	51.1013		56.64	56.7	55.12	55.25
