# Supplementary material for: Evolutionarily conserved long-chain Acyl-CoA synthetases regulate membrane composition and fluidity
Source: eLife. 2019 Nov 26;8:e47733. doi: 10.7554/eLife.47733 (PMC6901333; doi:10.7554/eLife.47733)
Supplement: Figure 4—figure supplement 2—source data 2. [file elife-47733-fig4-figsupp2-data2.xlsx]

## Sheet: Fig_4_Fig_Suppl_2B
Lipidomics data used in Figure 4 – figure supplement 2B. Lipidomics of worms grown on NGM plates. For the heat map, the data was normalized to paqr-2 mdt-15.
Heat map (PC)
						NGM
		paqr-2 mdt15 Control					paqr-2 mdt15 acs-13 Control
FA 15:0		0.6	0.68	0.64	0.98		0.57	0.52	0.58	0.56
FA 16:0		0.85	1.14	0.95	1.36		0.86	0.99	1.13	0.73
FA 16:1		0.66	0.6	0.6	0.68		0.73	0.62	0.66	0.82
FA 17:0		1.19	1.26	1.14	1.52		1.24	1.12	1.08	1.1
FA 17:1		6.42	5.91	6.54	5.66		5.06	6.02	5.54	5.07
FA 18:0		0.54	0.72	0.54	0.68		1.03	0.69	0.8	0.95
FA 18:1		32.23	32.11	31.08	33.83		30.63	28.84	28.87	30.12
FA 18:2		6.33	5.68	5.89	4.6		6.11	5.53	5.86	5.86
FA 18:3		3.14	3.06	3.2	3.33		2.93	3.05	2.99	3.01
FA 19:1		4.54	4.72	5.21	4.78		4.26	4.77	4.48	4.26
FA 20:2		0.21	0.21	0.19	0.18		0.27	0.24	0.22	0.26
FA 20:3		4.59	4.48	4.87	4.23		4.58	4.49	4.95	4.77
FA 20:4		9.91	10.13	10.05	9.8		11	12.41	11.65	11.46
FA 20:5		28.78	29.31	29.09	28.37		30.73	30.72	31.18	31.02
SFA		3.18	3.8	3.26	4.55		3.71	3.32	3.6	3.34
MUFA		43.85	43.34	43.43	44.94		40.68	40.24	39.54	40.27
PUFA		52.97	52.86	53.31	50.51		55.61	56.44	56.86	56.38
