# Supplementary material for: Evolutionarily conserved long-chain Acyl-CoA synthetases regulate membrane composition and fluidity
Source: eLife. 2019 Nov 26;8:e47733. doi: 10.7554/eLife.47733 (PMC6901333; doi:10.7554/eLife.47733)
Supplement: Figure 4—figure supplement 2—source data 3. [file elife-47733-fig4-figsupp2-data3.xlsx]

## Sheet: Fig_4_Fig_Suppl_2C
Lipidomics data used in Figure 4 – figure supplement 2C. Lipidomics of worms grown on glucose plates. For the heat map, the data was normalized to N2.
Heat map (PE)
						20 mM Glucose
		N2 Glcuose					acs-13 Glucose
FA 15:0		1.12	1.27	1.14	1.29		1.03677	0.968339	1.04167	1.01118
FA 16:0		6.55	6.33	6.19	6.54		5.35045	4.91694	6.08867	5.79199
FA 16:1		1.1	1.08	0.94	1.19		0.863247	0.705543	1.04144	1.39711
FA 17:0		2.48	2.48	2.42	2.82		2.41452	2.54337	2.01884	2.31659
FA 17:1		10.74	11.21	11.83	10.23		9.71272	8.82232	11.0479	9.72449
FA 18:0		5.73	5.93	6.25	6.5		5.97633	6.31614	6.43456	6.53375
FA 18:1		30.48	29.66	27.35	29.49		30.8892	30.9943	29.4008	32.1302
FA 18:2		18.06	18.48	18.71	17.94		17.3149	17.5252	16.393	17.1486
FA 18:3		2.16	2.13	2.19	2.17		1.7459	1.55644	2.50045	2.53494
FA 19:0		0.02	0.02	0.02	0.03		0.0269269	0.0438823	0.0271868	0.0297719
FA 19:1		7.12	7.01	8.07	7.13		8.03124	7.77422	7.68952	6.60373
FA 20:0		0.05	0.06	0.06	0.06		0.0587671	0.0567793	0.0679585	0.0782021
FA 20:1		0.33	0.34	0.4	0.37		0.441188	0.506349	0.34878	0.33824
FA 20:2		0.67	0.59	0.65	0.52		0.672857	0.769292	0.497858	0.512444
FA 20:3		4.26	4.33	4.3	4.32		4.78947	4.85427	5.10889	4.58812
FA 20:4		4.15	4.13	4.16	3.99		4.94094	5.55288	4.81459	4.53141
FA 20:5		4.98	4.95	5.32	5.4		5.73459	6.09372	5.47787	4.72925
SFA		15.97	16.1	16.08	17.24		14.8638	14.8455	15.6789	15.7615
MUFA		49.76	49.29	48.59	48.41		49.9376	48.8027	49.5285	50.1938
PUFA		34.27	34.61	35.33	34.35		35.1986	36.3518	34.7926	34.0448
