# Supplementary material for: Evolutionarily conserved long-chain Acyl-CoA synthetases regulate membrane composition and fluidity
Source: eLife. 2019 Nov 26;8:e47733. doi: 10.7554/eLife.47733 (PMC6901333; doi:10.7554/eLife.47733)
Supplement: Figure 4—figure supplement 2—source data 4. [file elife-47733-fig4-figsupp2-data4.xlsx]

## Sheet: Fig_4_Fig_Suppl_2D
Lipidomics data used in Figure 4 – figure supplement 2D. Lipidomics of worms grown on glucose plates. For the heat map, the data was normalized to N2.
Heat map (PC)
						20 mM Glucose
		N2 Glcuose					acs-13 Glucose
FA 15:0		0.553971	0.575523	0.549534	0.660511		0.431055	0.492634	0.495553	0.418897
FA 16:0		2.38989	2.29656	2.06222	2.34595		1.74105	1.63112	2.2205	2.79492
FA 16:1		0.866969	0.862737	0.824923	0.864765		0.56926	0.545764	0.823018	1.03281
FA 17:0		0.665082	0.766901	0.657888	0.780445		0.709047	0.75271	0.560681	0.522142
FA 17:1		6.58677	6.70062	7.5455	6.03797		5.63143	5.28441	6.53778	5.39755
FA 18:0		1.30353	1.35431	1.17012	1.25319		1.13472	1.01127	1.25033	1.2338
FA 18:1		16.8809	15.8692	16.2331	16.063		14.9855	14.6376	16.2632	17.7163
FA 18:2		12.1437	11.4539	12.1417	10.1441		11.9996	13.0427	9.45022	11.4127
FA 18:3		5.25295	5.2311	5.16648	4.97899		4.28535	3.88042	5.37603	5.76052
FA 19:1		9.2891	8.56162	9.25779	8.56275		9.88268	9.76436	9.12753	8.66834
FA 20:2		0.22613	0.240323	0.219837	0.275201		0.205293	0.266201	0.161148	0.186909
FA 20:3		3.64485	3.78234	3.30477	3.81571		3.41674	2.97662	3.98346	3.6856
FA 20:4		9.81034	9.56663	9.16931	9.95009		10.7731	10.5569	10.3993	11.2365
FA 20:5		30.3858	32.7383	31.6968	34.2673		34.2351	35.1574	33.3513	29.9329
SFA		4.91247	4.99329	4.43977	5.0401		4.01587	3.88774	4.52706	4.96976
MUFA		33.6238	31.9942	33.8613	31.5285		31.0689	30.2321	32.7515	32.815
PUFA		61.4638	63.0126	61.6989	63.4314		64.9152	65.8802	62.7214	62.2152
