# Supplementary material for: Evolutionarily conserved long-chain Acyl-CoA synthetases regulate membrane composition and fluidity
Source: eLife. 2019 Nov 26;8:e47733. doi: 10.7554/eLife.47733 (PMC6901333; doi:10.7554/eLife.47733)
Supplement: Figure 4—figure supplement 2—source data 5. [file elife-47733-fig4-figsupp2-data5.xlsx]

## Sheet: Fig_4_Fig_Suppl_2E
Lipidomics data used in Figure 4 – figure supplement 2E. Lipidomics of worms grown on glucose plates. For the heat map, the data was normalized to paqr-2 mdt-15.
Heat map (PE)
						20 mM Glucose
		paqr-2 mdt15 Glucose					paqr-2 mdt15 acs-13 Glucose
FA 15:0		1.59937	1.47091	1.57807	1.55671		1.39836	1.37464	1.46459	1.46471
FA 16:0		7.0461	7.05954	6.4559	6.32772		6.61615	6.28058	6.56112	6.67609
FA 16:1		0.919745	0.991989	0.678949	0.649862		0.883788	0.683099	0.881734	0.821118
FA 17:0		4.69293	4.7231	5.20399	5.26881		3.94658	3.90141	4.07619	3.96629
FA 17:1		8.13873	8.4511	8.40661	8.27643		8.64667	8.78135	8.74893	9.10801
FA 18:0		5.09787	5.25647	5.08892	4.85791		5.57628	5.5181	5.64935	5.65803
FA 18:1		32.2533	31.8572	30.9939	32.2222		30.4028	30.4583	30.5731	29.5631
FA 18:2		17.2976	16.2226	17.0046	16.6646		18.3543	18.0319	18.0162	18.5206
FA 18:3		1.54804	1.37188	1.36921	1.39623		1.62798	1.53702	1.61363	1.55933
FA 19:0		0.0641487	0.0550117	0.0515031	0.0491152		0.0581893	0.0507333	0.0506211	0.0540112
FA 19:1		5.60951	5.90873	6.31726	5.91978		5.72594	6.52797	5.89132	5.83248
FA 20:0		0.0561039	0.0523325	0.0513065	0.0475769		0.0573166	0.0490572	0.0482422	0.0566558
FA 20:1		0.699553	0.717371	0.803619	0.794348		0.710155	0.752064	0.719486	0.713832
FA 20:2		1.00706	0.990472	1.17283	1.24809		1.06957	1.09243	1.02797	1.06912
FA 20:3		4.77148	5.22963	5.12866	5.059		4.99959	4.83345	4.99261	4.94625
FA 20:4		4.67514	5.10253	5.11432	5.17448		5.18783	5.23963	5.19758	5.25205
FA 20:5		4.52329	4.53917	4.58033	4.48708		4.73854	4.88827	4.48728	4.73833
SFA		18.5565	18.6174	18.4297	18.1078		17.6529	17.1745	17.8501	17.8758
MUFA		47.6208	47.9264	47.2004	47.8626		46.3693	47.2028	46.8146	46.0386
PUFA		33.8227	33.4563	34.3699	34.0295		35.9778	35.6227	35.3353	36.0856
