# Supplementary material for: Evolutionarily conserved long-chain Acyl-CoA synthetases regulate membrane composition and fluidity
Source: eLife. 2019 Nov 26;8:e47733. doi: 10.7554/eLife.47733 (PMC6901333; doi:10.7554/eLife.47733)
Supplement: Figure 4—figure supplement 2—source data 6. [file elife-47733-fig4-figsupp2-data6.xlsx]

## Sheet: Fig_4_Fig_Suppl_2F
Lipidomics data used in Figure 4 – figure supplement 2F. Lipidomics of worms grown on glucose plates. For the heat map, the data was normalized to paqr-2 mdt-15.
Heat map (PC)
						20 mM Glucose
		paqr-2 mdt15 Glucose					paqr-2 mdt15 acs-13 Glucose
FA 15:0		0.403552	0.406093	0.399223	0.391098		0.407505	0.380416	0.410896	0.390537
FA 16:0		1.53882	1.79882	1.50362	1.47835		1.64269	1.30588	1.55525	1.53883
FA 16:1		0.850762	0.952288	0.70941	0.689018		0.890618	0.711112	0.825668	0.7693
FA 17:0		0.912163	0.917513	0.986231	0.951748		0.815083	0.737777	0.828616	0.760396
FA 17:1		6.47131	5.98157	6.71052	6.63181		6.17069	6.44137	6.2611	6.38603
FA 18:0		1.24896	1.18888	1.17334	1.23148		1.29125	0.979462	1.24432	1.0959
FA 18:1		18.362	18.5108	17.6431	18.9228		17.1856	16.5547	16.9636	16.4723
FA 18:2		11.8399	10.9059	11.3592	11.3797		12.1895	12.2317	11.2505	12.5213
FA 18:3		4.56026	4.15711	4.26576	4.30684		4.47064	4.51245	4.44869	4.45769
FA 19:1		7.25872	6.75498	8.05321	7.15093		7.82062	8.37355	7.67774	7.73338
FA 20:2		0.373188	0.333836	0.388209	0.425927		0.348041	0.342162	0.331554	0.310387
FA 20:3		4.71894	5.05522	4.8435	4.85915		4.86833	4.34544	4.78504	4.70193
FA 20:4		11.848	11.9831	12.3248	12.8163		12.55	12.4592	12.633	12.9559
FA 20:5		29.6134	31.0539	29.6398	28.7649		29.3494	30.6247	30.784	29.9061
SFA		4.1035	4.31131	4.06241	4.05268		4.15653	3.40354	4.03908	3.78567
MUFA		32.9428	32.1997	33.1163	33.3945		32.0676	32.0808	31.7281	31.361
PUFA		62.9537	63.489	62.8213	62.5528		63.7759	64.5157	64.2328	64.8533
