# Supplementary material for: Evolutionarily conserved long-chain Acyl-CoA synthetases regulate membrane composition and fluidity
Source: eLife. 2019 Nov 26;8:e47733. doi: 10.7554/eLife.47733 (PMC6901333; doi:10.7554/eLife.47733)
Supplement: Figure 4—figure supplement 3—source data 7. [file elife-47733-fig4-figsupp3-data7.xlsx]

## Sheet: Fig_4_Fig_Suppl_3A
Lipidomics data used in Figure 4 – figure supplement 3A. Lipidomics of worms grown on NGM plates and plates supplemented with 20 mM glucose.
Composition (mol%) in PC
	N2 Control				N2 Glucose					acs-13 Control				acs-13 Glucose					mdt-15 Control				mdt-15 Glucose					paqr-2 mdt15 Control				paqr-2 mdt15 Glucose					paqr-2 mdt15 acs-13 Control				paqr-2 mdt15 acs-13 Glucose					paqr-2 Control
FA 15:0	0.827613	0.761207	0.835201	0.797588	0.553971	0.575523	0.549534	0.660511		0.734316	0.703535	0.701316	0.782863	0.431055	0.492634	0.495553	0.418897		0.544336	0.568965	0.531576	0.648746	0.424282	0.445869	0.46532	0.454262		0.597562	0.68222	0.638445	0.984949	0.403552	0.406093	0.399223	0.391098		0.56734	0.522557	0.5834	0.561025	0.407505	0.380416	0.410896	0.390537		1.15036	0.721243	0.716782	0.78359
FA 16:0	1.05749	0.914172	1.06664	1.09934	2.38989	2.29656	2.06222	2.34595		0.78787	0.958583	1.051	1.02423	1.74105	1.63112	2.2205	2.79492		0.640446	0.657692	0.663269	1.10311	1.36357	1.69769	1.47319	1.60852		0.848576	1.13625	0.94671	1.3649	1.53882	1.79882	1.50362	1.47835		0.863996	0.985699	1.1342	0.727627	1.64269	1.30588	1.55525	1.53883		1.33678	1.26601	1.03325	1.09729
FA 17:0	1.10153	1.33826	1.23594	1.17595	0.665082	0.766901	0.657888	0.780445		1.31812	1.12893	1.0682	1.05362	0.709047	0.75271	0.560681	0.522142		1.09572	1.04617	1.06378	1.35632	0.77018	0.770684	0.771069	0.76578		1.18902	1.25725	1.13942	1.52031	0.912163	0.917513	0.986231	0.951748		1.24447	1.12394	1.07941	1.1014	0.815083	0.737777	0.828616	0.760396		1.47079	1.2345	1.21029	1.1548
FA 18:0	0.940906	0.900855	0.931784	0.891342	1.30353	1.35431	1.17012	1.25319		1.33196	0.813191	1.01843	0.99178	1.13472	1.01127	1.25033	1.2338		0.796087	0.893392	0.608973	0.664799	0.819663	1.08867	1.0527	1.02328		0.544011	0.723605	0.535875	0.678386	1.24896	1.18888	1.17334	1.23148		1.03052	0.691874	0.804128	0.952316	1.29125	0.979462	1.24432	1.0959		0.993368	1.23121	0.910336	1.16385
SFA	3.92754	3.91449	4.06957	3.96422	4.91247	4.99329	4.43977	5.0401		4.17226	3.60424	3.83894	3.85249	4.01587	3.88774	4.52706	4.96976		3.07658	3.16622	2.8676	3.77297	3.3777	4.00292	3.76228	3.85184		3.17917	3.79933	3.26045	4.54855	4.1035	4.31131	4.06241	4.05268		3.70633	3.32407	3.60113	3.34237	4.15653	3.40354	4.03908	3.78567		4.9513	4.45297	3.87066	4.19954
[truncated: 12 more columns]
