# Supplementary material for: Evolutionarily conserved long-chain Acyl-CoA synthetases regulate membrane composition and fluidity
Source: eLife. 2019 Nov 26;8:e47733. doi: 10.7554/eLife.47733 (PMC6901333; doi:10.7554/eLife.47733)
Supplement: Figure 4—figure supplement 3—source data 8. [file elife-47733-fig4-figsupp3-data8.xlsx]

## Sheet: Fig_4_Fig_Suppl_3B
Lipidomics data used in Figure 4 – figure supplement 3B. Lipidomics of worms grown on NGM plates and plates supplemented with 20 mM glucose.
Composition (mol%) in PC
	N2 Control				N2 Glucose					acs-13 Control				acs-13 Glucose					mdt-15 Control				mdt-15 Glucose					paqr-2 mdt15 Control				paqr-2 mdt15 Glucose					paqr-2 mdt15 acs-13 Control				paqr-2 mdt15 acs-13 Glucose					paqr-2 Control
FA 16:1	1.22275	1.33811	1.13595	1.2	0.866969	0.862737	0.824923	0.864765		0.922704	1.02633	1.14388	1.09648	0.56926	0.545764	0.823018	1.03281		0.682049	0.77229	0.784096	0.560797	0.598493	0.610546	0.602355	0.570889		0.659253	0.600629	0.599301	0.680858	0.850762	0.952288	0.70941	0.689018		0.728233	0.61568	0.655291	0.822186	0.890618	0.711112	0.825668	0.7693		1.25909	1.08336	1.22519	1.23697
FA 17:1	6.43599	6.36588	7.05043	6.47905	6.58677	6.70062	7.5455	6.03797		4.79793	5.66694	5.822	6.128	5.63143	5.28441	6.53778	5.39755		5.61812	5.70216	5.64479	5.80026	6.19341	6.57793	6.47648	6.78069		6.42113	5.90884	6.54417	5.65622	6.47131	5.98157	6.71052	6.63181		5.0576	6.01729	5.53608	5.07461	6.17069	6.44137	6.2611	6.38603		6.06657	7.22265	6.98274	6.25313
FA 18:1	30.08	31.25	30.48	32.33	16.88	15.87	16.23	16.06		28.71	27.87	29.25	28.63	14.99	14.64	16.26	17.72		30.04	31.98	30.59	27.46	16.98	17.58	17.38	17.25		32.23	32.11	31.08	33.83	18.36	18.51	17.64	18.92		30.63	28.84	28.87	30.12	17.19	16.55	16.96	16.47		37.14	31.03	30.98	32.67
FA 19:1	5.04143	4.87145	5.42435	4.92692	9.2891	8.56162	9.25779	8.56275		4.75678	5.13104	4.81895	5.03786	9.88268	9.76436	9.12753	8.66834		4.66792	4.60868	4.49539	5.03747	8.15201	8.3399	8.20023	8.71001		4.5391	4.72004	5.20929	4.7758	7.25872	6.75498	8.05321	7.15093		4.26315	4.76866	4.48373	4.25809	7.82062	8.37355	7.67774	7.73338		4.23894	4.10493	4.41422	3.60259
MUFA	42.7809	43.8206	44.0891	44.9345	33.6238	31.9942	33.8613	31.5285		39.1896	39.6943	41.0371	40.8948	31.0689	30.2321	32.7515	32.815		41.007	43.0589	41.5184	38.8572	31.9245	33.1089	32.6554	33.3112		43.8499	43.3399	43.4283	44.9444	32.9428	32.1997	33.1163	33.3945		40.6837	40.2393	39.5416	40.2733	32.0676	32.0808	31.7281	31.361		48.6999	43.4397	43.6006	43.7659
[truncated: 12 more columns]
