# Supplementary material for: Evolutionarily conserved long-chain Acyl-CoA synthetases regulate membrane composition and fluidity
Source: eLife. 2019 Nov 26;8:e47733. doi: 10.7554/eLife.47733 (PMC6901333; doi:10.7554/eLife.47733)
Supplement: Figure 4—figure supplement 3—source data 9. [file elife-47733-fig4-figsupp3-data9.xlsx]

## Sheet: Fig_4_Fig_Suppl_3C
Lipidomics data used in Figure 4 – figure supplement 3C. Lipidomics of worms grown on NGM plates and plates supplemented with 20 mM glucose.
Composition (mol%) in PC
	N2 Control				N2 Glucose					acs-13 Control				acs-13 Glucose					mdt-15 Control				mdt-15 Glucose					paqr-2 mdt15 Control				paqr-2 mdt15 Glucose					paqr-2 mdt15 acs-13 Control				paqr-2 mdt15 acs-13 Glucose					paqr-2 Control
FA 18:2	5.45673	4.61622	5.37869	5.94433	12.1437	11.4539	12.1417	10.1441		4.92892	5.75353	5.52016	5.03016	11.9996	13.0427	9.45022	11.4127		5.55743	5.39385	6.96031	5.98225	12.6689	11.8321	12.4385	12.4038		6.33368	5.681	5.89257	4.60238	11.8399	10.9059	11.3592	11.3797		6.10838	5.52687	5.86312	5.86253	12.1895	12.2317	11.2505	12.5213		3.91824	5.23447	5.17964	5.0992
FA 18:3	3.68332	3.29658	3.82702	4.01849	5.25295	5.2311	5.16648	4.97899		3.10324	3.27981	3.67443	3.65708	4.28535	3.88042	5.37603	5.76052		2.76102	2.88131	2.95308	2.80508	4.31352	4.48606	4.22941	4.52242		3.13882	3.05775	3.2049	3.33149	4.56026	4.15711	4.26576	4.30684		2.92585	3.04651	2.9861	3.01238	4.47064	4.51245	4.44869	4.45769		3.88613	3.18362	3.83208	3.34157
FA 20:2	0.193256	0.167914	0.165268	0.189118	0.22613	0.240323	0.219837	0.275201		0.195427	0.199149	0.15555	0.174175	0.205293	0.266201	0.161148	0.186909		0.228154	0.270423	0.29526	0.229862	0.299347	0.275571	0.312041	0.274615		0.211065	0.205162	0.192983	0.180249	0.373188	0.333836	0.388209	0.425927		0.265517	0.244306	0.223078	0.255907	0.348041	0.342162	0.331554	0.310387		0.138975	0.149615	0.118238	0.159896
FA 20:3	3.81636	3.69457	3.708	3.82654	3.64485	3.78234	3.30477	3.81571		3.75399	3.92306	3.91827	4.0497	3.41674	2.97662	3.98346	3.6856		5.27583	5.30503	4.85907	5.24808	4.57926	5.04702	4.80839	4.79049		4.59159	4.48323	4.87313	4.22971	4.71894	5.05522	4.8435	4.85915		4.57513	4.49161	4.95201	4.77099	4.86833	4.34544	4.78504	4.70193		3.68144	4.22938	4.21948	4.50341
FA 20:4	8.88319	9.18346	8.67276	8.93335	9.81034	9.56663	9.16931	9.95009		10.2673	10.3956	9.86045	10.1008	10.7731	10.5569	10.3993	11.2365		11.5274	11.3502	10.5355	11.4978	11.7775	11.9858	12.2884	11.8804		9.91352	10.1264	10.0534	9.79505	11.848	11.9831	12.3248	12.8163		11.0007	12.4095	11.652	11.4621	12.55	12.4592	12.633	12.9559		8.29688	9.33208	9.31979	9.57949
FA 20:5	31.2587	31.3062	30.0896	28.1895	30.3858	32.7383	31.6968	34.2673		34.3892	33.1503	31.9951	32.2409	34.2351	35.1574	33.3513	29.9329		30.5665	28.5741	30.0108	31.6067	31.0593	29.2617	29.5056	28.9652		28.7823	29.3072	29.0943	28.3681	29.6134	31.0539	29.6398	28.7649		30.7344	30.7178	31.181	31.0204	29.3494	30.6247	30.784	29.9061		26.4271	29.9782	29.8595	29.351
PUFA	53.2915	52.2649	51.8413	51.1013	61.4638	63.0126	61.6989	63.4314		56.6381	56.7015	55.1239	55.2527	64.9152	65.8802	62.7214	62.2152		55.9164	53.7749	55.614	57.3698	64.6978	62.8881	63.5823	62.8369		52.971	52.8607	53.3113	50.507	62.9537	63.489	62.8213	62.5528		55.6099	56.4367	56.8573	56.3843	63.7759	64.5157	64.2328	64.8533		46.3488	52.1074	52.5287	52.0346
[truncated: 12 more columns]
