# Supplementary material for: Evolutionarily conserved long-chain Acyl-CoA synthetases regulate membrane composition and fluidity
Source: eLife. 2019 Nov 26;8:e47733. doi: 10.7554/eLife.47733 (PMC6901333; doi:10.7554/eLife.47733)
Supplement: Figure 4—figure supplement 3—source data 10. [file elife-47733-fig4-figsupp3-data10.xlsx]

## Sheet: Fig_4_Fig_Suppl_3D
Lipidomics data used in Figure 4 – figure supplement 3D. Lipidomics of worms grown on NGM plates and plates supplemented with 20 mM glucose.
Composition (mol%) in PE
	N2 Control				N2 Glucose					acs-13 Control				acs-13 Glucose					mdt-15 Control				mdt-15 Glucose					paqr-2 mdt15 Control				paqr-2 mdt15 Glucose					paqr-2 mdt15 acs-13 Control				paqr-2 mdt15 acs-13 Glucose					paqr-2 Control
FA 15:0	1.74285	1.71876	1.62972	1.62079	1.12361	1.27391	1.13918	1.29302		1.44647	1.40886	1.50133	1.47177	1.03677	0.968339	1.04167	1.01118		1.86278	1.84193	1.66426	1.6228	1.27914	1.31438	1.4273	1.46194		1.60853	1.76885	1.69959	1.81971	1.59937	1.47091	1.57807	1.55671		1.7452	1.48307	1.37698	1.74938	1.39836	1.37464	1.46459	1.46471		2.21819	2.41654	2.05317	2.33604
FA 16:0	3.84173	3.71933	4.65942	4.19798	6.54859	6.33373	6.18632	6.5439		2.9689	3.58945	3.62634	3.97364	5.35045	4.91694	6.08867	5.79199		2.84121	2.798	3.4973	4.19507	5.26106	5.81969	5.8836	5.93128		5.88917	6.0449	5.30498	5.74481	7.0461	7.05954	6.4559	6.32772		3.36612	4.40674	5.17265	3.26054	6.61615	6.28058	6.56112	6.67609		5.10159	4.57924	4.54096	4.37546
FA 17:0	4.0116	4.68815	4.01209	3.70326	2.48364	2.48376	2.41792	2.81627		4.27987	4.05375	3.74137	3.722	2.41452	2.54337	2.01884	2.31659		5.11176	4.9904	5.03505	5.7131	3.75171	3.50973	3.8626	3.75222		5.05399	5.3151	5.43692	4.83471	4.69293	4.7231	5.20399	5.26881		5.11736	4.64864	4.66552	5.00745	3.94658	3.90141	4.07619	3.96629		5.05153	5.33911	5.46807	5.31573
FA 18:0	4.16479	4.60241	3.75279	3.7994	5.7349	5.92681	6.25301	6.50097		4.35742	4.45882	4.72491	4.55402	5.97633	6.31614	6.43456	6.53375		3.43833	3.6467	3.31943	3.44927	5.11308	5.2202	4.9529	5.00992		2.75402	2.97305	3.13418	2.55051	5.09787	5.25647	5.08892	4.85791		3.66674	3.77071	3.80367	3.77844	5.57628	5.5181	5.64935	5.65803		4.83164	4.50574	4.39505	4.44312
FA 19:0	0.105102	0.133737	0.118899	0.105223	0.0229086	0.0246776	0.0230456	0.0282936		0.148957	0.143623	0.122321	0.126912	0.0269269	0.0438823	0.0271868	0.0297719		0.165438	0.174811	0.147	0.186837	0.0466343	0.0502435	0.0399636	0.0357579		0.121787	0.145251	0.146325	0.162395	0.0641487	0.0550117	0.0515031	0.0491152		0.168721	0.169346	0.149031	0.169548	0.0581893	0.0507333	0.0506211	0.0540112		0.186539	0.128783	0.0727305	0.152019
FA 20:0	0.117603	0.124249	0.115174	0.123219	0.0531956	0.0593902	0.062991	0.0576392		0.116055	0.115553	0.13943	0.122952	0.0587671	0.0567793	0.0679585	0.0782021		0.101943	0.111867	0.101772	0.0997534	0.0601326	0.058116	0.0543647	0.0491691		0.0970138	0.0933077	0.0912697	0.0779875	0.0561039	0.0523325	0.0513065	0.0475769		0.106286	0.103725	0.105591	0.116998	0.0573166	0.0490572	0.0482422	0.0566558		0.15486	0.116024	0.149043	0.133484
SFA	13.9837	14.9866	14.2881	13.5499	15.9668	16.1023	16.0825	17.2401		13.3177	13.7701	13.8557	13.9713	14.8638	14.8455	15.6789	15.7615		13.5215	13.5637	13.7648	15.2668	15.5118	15.9724	16.2207	16.2403		15.5245	16.3405	15.8133	15.1901	18.5565	18.6174	18.4297	18.1078		14.1704	14.5822	15.2734	14.0824	17.6529	17.1745	17.8501	17.8758		17.5443	17.0854	16.679	16.7559
[truncated: 12 more columns]
