# Supplementary material for: Evolutionarily conserved long-chain Acyl-CoA synthetases regulate membrane composition and fluidity
Source: eLife. 2019 Nov 26;8:e47733. doi: 10.7554/eLife.47733 (PMC6901333; doi:10.7554/eLife.47733)
Supplement: Figure 4—figure supplement 3—source data 11. [file elife-47733-fig4-figsupp3-data11.xlsx]

## Sheet: Fig_4_Fig_Suppl_3E
Lipidomics data used in Figure 4 – figure supplement 3E. Lipidomics of worms grown on NGM plates and plates supplemented with 20 mM glucose.
Composition (mol%) in PE
	N2 Control				N2 Glucose					acs-13 Control				acs-13 Glucose					mdt-15 Control				mdt-15 Glucose					paqr-2 mdt15 Control				paqr-2 mdt15 Glucose					paqr-2 mdt15 acs-13 Control				paqr-2 mdt15 acs-13 Glucose					paqr-2 Control
FA 16:1	1.74887	1.98923	1.76814	1.68176	1.09582	1.07503	0.93656	1.19107		1.41104	1.53502	1.61779	1.64439	0.863247	0.705543	1.04144	1.39711		0.97761	0.999891	1.40076	0.866093	0.58457	0.624645	0.636881	0.630677		1.63883	1.43226	1.26705	1.40546	0.919745	0.991989	0.678949	0.649862		0.981456	1.06508	1.24214	0.919491	0.883788	0.683099	0.881734	0.821118		1.55268	1.34832	1.3642	1.51423
FA 17:1	11.14	9.98942	13.7797	11.6988	10.7397	11.208	11.829	10.228		7.81616	10.0819	9.47926	10.9097	9.71272	8.82232	11.0479	9.72449		7.09158	7.08044	9.04646	8.36278	7.86485	8.41761	8.42796	8.68903		13.1663	12.3466	11.8391	10.3867	8.13873	8.4511	8.40661	8.27643		7.09073	9.29562	10.1398	6.55819	8.64667	8.78135	8.74893	9.10801		8.38458	9.00278	8.4652	7.49325
FA 18:1	47.0441	47.8549	44.6164	47.0822	30.4816	29.6632	27.3547	29.4874		49.8667	45.4425	46.7863	45.5224	30.8892	30.9943	29.4008	32.1302		48.2126	48.5199	44.7338	43.508	31.0262	30.5635	30.9736	29.8652		44.6444	45.0429	43.517	51.7276	32.2533	31.8572	30.9939	32.2222		48.9561	47.0582	44.907	50.3349	30.4028	30.4583	30.5731	29.5631		52.4887	49.3188	51.1998	50.5985
FA 19:1	3.76203	3.39754	4.769	4.23034	7.11655	7.00803	8.06877	7.13447		3.40121	4.15891	3.65226	4.03456	8.03124	7.77422	7.68952	6.60373		3.69814	3.43432	4.08765	4.59381	6.04939	6.07598	5.66323	6.43629		5.36502	5.27768	5.54986	4.75106	5.60951	5.90873	6.31726	5.91978		3.31764	4.20878	4.51696	3.13687	5.72594	6.52797	5.89132	5.83248		3.58767	3.48795	3.45056	3.01461
FA 20:1	0.466797	0.468922	0.394204	0.411198	0.328246	0.337381	0.399007	0.370391		0.676346	0.601944	0.546589	0.537372	0.441188	0.506349	0.34878	0.33824		0.873533	0.915466	0.919015	0.821685	0.689109	0.592874	0.590816	0.615631		0.810586	0.799263	0.946415	0.849831	0.699553	0.717371	0.803619	0.794348		1.0284	1.0115	0.938263	1.03157	0.710155	0.752064	0.719486	0.713832		0.623827	0.596169	0.555492	0.641994
MUFA	64.1618	63.7	65.3274	65.1042	49.7619	49.2916	48.588	48.4113		63.1714	61.8203	62.0822	62.6484	49.9376	48.8027	49.5285	50.1938		60.8535	60.95	60.1877	58.1524	46.2142	46.2746	46.2924	46.2368		65.6252	64.8987	63.1194	69.1206	47.6208	47.9264	47.2004	47.8626		61.3743	62.6392	61.7441	61.981	46.3693	47.2028	46.8146	46.0386		66.6374	63.754	65.0353	63.2626
[truncated: 12 more columns]
