# Supplementary material for: Evolutionarily conserved long-chain Acyl-CoA synthetases regulate membrane composition and fluidity
Source: eLife. 2019 Nov 26;8:e47733. doi: 10.7554/eLife.47733 (PMC6901333; doi:10.7554/eLife.47733)
Supplement: Figure 4—source data 1. [file elife-47733-fig4-data1.xlsx]

## Sheet: FIG_4D
Lipidomics data used in Figure 4D. Lipidomics of worms grown on NGM plates and plates supplemented with 20mM glucose.
Composition (mol%) in PE
	N2 Control				N2 Glucose					acs-13 Control				acs-13 Glucose					mdt-15 Control				mdt-15 Glucose					paqr-2 mdt15 Control				paqr-2 mdt15 Glucose					paqr-2 mdt15 acs-13 Control				paqr-2 mdt15 acs-13 Glucose					paqr-2 Control
FA 18:2	8.90315	8.00005	8.11459	8.79666	18.0563	18.4778	18.7123	17.9443		7.95968	8.90724	9.04689	8.40449	17.3149	17.5252	16.393	17.1486		9.93741	9.58555	10.8335	9.84668	19.1094	18.9338	19.3499	19.3828		7.46605	7.14672	8.05657	4.77615	17.2976	16.2226	17.0046	16.6646		9.92449	8.2679	8.72794	9.39476	18.3543	18.0319	18.0162	18.5206		4.52883	7.22292	7.17363	7.11359
FA 18:3	1.39329	1.31305	1.3909	1.51294	2.16072	2.13499	2.18792	2.173		1.23163	1.4095	1.64037	1.60467	1.7459	1.55644	2.50045	2.53494		1.16571	1.23356	1.11631	1.21311	1.59159	1.83653	1.67769	1.78172		0.984414	0.922427	1.08078	0.798569	1.54804	1.37188	1.36921	1.39623		1.17039	1.07895	1.11228	1.22949	1.62798	1.53702	1.61363	1.55933		0.993254	1.07581	0.990686	1.13109
FA 20:2	0.25	0.26	0.22	0.28	0.67	0.59	0.65	0.52		0.28	0.31	0.24	0.24	0.67	0.77	0.5	0.51		0.42	0.4	0.49	0.42	1.03	0.9	0.95	0.95		0.34	0.33	0.39	0.25	1.01	0.99	1.17	1.25		0.49	0.5	0.42	0.44	1.07	1.09	1.03	1.07		0.18	0.22	0.19	0.23
FA 20:3	3.45	3.73	3.17	3.14	4.26	4.33	4.3	4.32		4.23	3.99	3.94	4.01	4.79	4.85	5.11	4.59		5.07	5.28	4.68	5.41	6.18	6.24	5.93	5.82		3.24	3.25	3.82	2.57	4.77	5.23	5.13	5.06		4.06	4.08	3.91	4.09	5	4.83	4.99	4.95		2.76	3.44	3.28	3.81
FA 20:4	3.34	3.39	3.15	3.15	4.15	4.13	4.16	3.99		4.44	4.25	4.05	3.99	4.94	5.55	4.81	4.53		4.69	4.62	4.49	4.86	5.42	5.08	5.16	5.01		3.3	3.39	3.83	2.85	4.68	5.1	5.11	5.17		4.36	4.44	4.32	4.35	5.19	5.24	5.2	5.25		2.81	3.15	2.99	3.57
FA 20:5	4.52	4.61	4.34	4.46	4.98	4.95	5.32	5.4		5.37	5.55	5.15	5.12	5.73	6.09	5.48	4.73		4.34	4.37	4.43	4.83	4.95	4.77	4.41	4.58		3.53	3.72	3.89	4.44	4.52	4.54	4.58	4.49		4.45	4.41	4.5	4.43	4.74	4.89	4.49	4.74		4.55	4.06	3.66	4.13
PUFA	21.8545	21.3134	20.3845	21.3459	34.2713	34.6061	35.3295	34.3486		23.5109	24.4096	24.0621	23.3803	35.1986	36.3518	34.7926	34.0448		25.6251	25.4863	26.0475	26.5808	38.2741	37.7531	37.4868	37.5229		18.8503	18.7609	21.0674	15.6893	33.8227	33.4563	34.3699	34.0295		24.4552	22.7786	22.9825	23.9366	35.9778	35.6227	35.3353	36.0856		15.8182	19.1606	18.2857	19.9815
[truncated: 12 more columns]
