# Supplementary material for: Evolutionarily conserved long-chain Acyl-CoA synthetases regulate membrane composition and fluidity
Source: eLife. 2019 Nov 26;8:e47733. doi: 10.7554/eLife.47733 (PMC6901333; doi:10.7554/eLife.47733)
Supplement: Figure 4—source data 2. [file elife-47733-fig4-data2.xlsx]

## Sheet: FIG_4E
Lipidomics data used in Figure 4E. Lipidomics of worms grown on NGM plates . For the heat map, the data was normalized to N2.
Heat map (PE)
		N2 Control					acs-13 Control					paqr-2 mdt15 Control					paqr-2 mdt15 acs-13 Control
FA 15:0		1.74285	1.71876	1.62972	1.62079		1.44647	1.40886	1.50133	1.47177		1.60853	1.76885	1.69959	1.81971		1.7452	1.48307	1.37698	1.74938
FA 16:0		3.84173	3.71933	4.65942	4.19798		2.9689	3.58945	3.62634	3.97364		5.88917	6.0449	5.30498	5.74481		3.36612	4.40674	5.17265	3.26054
FA 16:1		1.74887	1.98923	1.76814	1.68176		1.41104	1.53502	1.61779	1.64439		1.63883	1.43226	1.26705	1.40546		0.981456	1.06508	1.24214	0.919491
FA 17:0		4.0116	4.68815	4.01209	3.70326		4.27987	4.05375	3.74137	3.722		5.05399	5.3151	5.43692	4.83471		5.11736	4.64864	4.66552	5.00745
FA 17:1		11.14	9.98942	13.7797	11.6988		7.81616	10.0819	9.47926	10.9097		13.1663	12.3466	11.8391	10.3867		7.09073	9.29562	10.1398	6.55819
FA 18:0		4.16479	4.60241	3.75279	3.7994		4.35742	4.45882	4.72491	4.55402		2.75402	2.97305	3.13418	2.55051		3.66674	3.77071	3.80367	3.77844
FA 18:1		47.0441	47.8549	44.6164	47.0822		49.8667	45.4425	46.7863	45.5224		44.6444	45.0429	43.517	51.7276		48.9561	47.0582	44.907	50.3349
FA 18:2		8.90315	8.00005	8.11459	8.79666		7.95968	8.90724	9.04689	8.40449		7.46605	7.14672	8.05657	4.77615		9.92449	8.2679	8.72794	9.39476
FA 18:3		1.39329	1.31305	1.3909	1.51294		1.23163	1.4095	1.64037	1.60467		0.984414	0.922427	1.08078	0.798569		1.17039	1.07895	1.11228	1.22949
FA 19:0		0.105102	0.133737	0.118899	0.105223		0.148957	0.143623	0.122321	0.126912		0.121787	0.145251	0.146325	0.162395		0.168721	0.169346	0.149031	0.169548
FA 19:1		3.76203	3.39754	4.769	4.23034		3.40121	4.15891	3.65226	4.03456		5.36502	5.27768	5.54986	4.75106		3.31764	4.20878	4.51696	3.13687
FA 20:0		0.117603	0.124249	0.115174	0.123219		0.116055	0.115553	0.13943	0.122952		0.0970138	0.0933077	0.0912697	0.0779875		0.106286	0.103725	0.105591	0.116998
FA 20:1		0.466797	0.468922	0.394204	0.411198		0.676346	0.601944	0.546589	0.537372		0.810586	0.799263	0.946415	0.849831		1.0284	1.0115	0.938263	1.03157
FA 20:2		0.252522	0.257413	0.221583	0.278741		0.281269	0.307892	0.23766	0.241815		0.335584	0.328257	0.387723	0.254008		0.494353	0.498735	0.417311	0.435475
FA 20:3		3.4475	3.73381	3.1721	3.14301		4.22626	3.99313	3.93753	4.01114		3.23882	3.25353	3.82249	2.56612		4.05574	4.0839	3.90636	4.08949
FA 20:4		3.33513	3.39448	3.14692	3.15496		4.4405	4.24549	4.04909	3.9933		3.29805	3.38603	3.82827	2.8538		4.35834	4.4352	4.32156	4.35453
FA 20:5		4.52292	4.61458	4.33837	4.4596		5.37156	5.54639	5.15058	5.12487		3.52735	3.72393	3.89154	4.44063		4.45193	4.41392	4.49701	4.43285
SFA		13.9837	14.9866	14.2881	13.5499		13.3177	13.7701	13.8557	13.9713		15.5245	16.3405	15.8133	15.1901		14.1704	14.5822	15.2734	14.0824
MUFA		64.1618	63.7	65.3274	65.1042		63.1714	61.8203	62.0822	62.6484		65.6252	64.8987	63.1194	69.1206		61.3743	62.6392	61.7441	61.981
PUFA		21.8545	21.3134	20.3845	21.3459		23.5109	24.4096	24.0621	23.3803		18.8503	18.7609	21.0674	15.6893		24.4552	22.7786	22.9825	23.9366
