# Supplementary material for: Evolutionarily conserved long-chain Acyl-CoA synthetases regulate membrane composition and fluidity
Source: eLife. 2019 Nov 26;8:e47733. doi: 10.7554/eLife.47733 (PMC6901333; doi:10.7554/eLife.47733)
Supplement: Figure 6—figure supplement 1—source data 1. [file elife-47733-fig6-figsupp1-data1.xlsx]

## Sheet: Fig_6_Fig_Suppl_1A-E
Lipidomics data used in Figure 6 – figure supplement 1A-E. Lipidomics of HEK293 treated with 400 uM PA
Sphingolipids
		NT siRNA				ACSL1 siRNA
Sphingomyelin		0.151756	0.180932	0.128688	0.176769	0.162135	0.174626	0.211022	0.198268
Cer *1000/ PC		72.271	87.8825	64.4684	67.8335	59.0996	41.6692	58.9969	54.0051
DiCer *1000/ PC		6.68333	8.03157	5.99925	6.20278	2.59801	1.64644	2.4956	2.40155
GluCer *1000/ PC		61.5015	64.3814	61.0434	59.8207	36.1634	38.025	49.0527	42.4744
LacCer *1000/ PC		8.94209	9.64456	7.6501	8.31327	9.27069	6.15124	11.174	10.129
