# Supplementary material for: Evolutionarily conserved long-chain Acyl-CoA synthetases regulate membrane composition and fluidity
Source: eLife. 2019 Nov 26;8:e47733. doi: 10.7554/eLife.47733 (PMC6901333; doi:10.7554/eLife.47733)
Supplement: Figure 6—figure supplement 1—source data 2. [file elife-47733-fig6-figsupp1-data2.xlsx]

## Sheet: Fig_6_Fig_Suppl_1F
Lipidomics data used in Figure 6 – figure supplement 1F. Lipidomics of HEK293 treated with 400 uM PA
Note that for the Figure 6-Supplementary 1F panel the data was normalized to the control treatment (NT siRNA) -> %
Total Phospholipid / mg protein
		NT siRNA				ACSL1 siRNA
PC / protein		9662.16	8836.2	8657.57	9576.12	12047.5	7688.43	5156.75	7266.77
PE diacyl / protein		2205.45	2274.65	2170.96	2599.59	4719.55	2274.48	1806.69	2561.72
PE alkenyl-acyl / protein		2339.93	2026.01	2360.42	2123.6	3337.88	2403.39	1528.42	2206.28
PI / protein		2288.85	2562.14	2772.68	2323.05	3208.39	2052.79	1689.58	2180.39
PS / protein		2550.03	1997.92	1732.37	1664.56	5434.49	1472.18	1295.92	1769.12
