# Supplementary material for: Evolutionarily conserved long-chain Acyl-CoA synthetases regulate membrane composition and fluidity
Source: eLife. 2019 Nov 26;8:e47733. doi: 10.7554/eLife.47733 (PMC6901333; doi:10.7554/eLife.47733)
Supplement: Figure 6—figure supplement 2—source data 3. [file elife-47733-fig6-figsupp2-data3.xlsx]

## Sheet: Fig_6_Fig_Suppl_2A-B and E
Lipidomics data used in Figure 6 – figure supplement 2A-B and E. Lipidomics of HEK293 under basal conditions
Composition (mol%) in PC
		NT siRNA				ACSL1 siRNA
FA 14:0		1.39058	1.50054	1.58931	1.36929	1.17269	1.20314	1.12164	1.20847
FA 14:1		0.0469804	0.0473477	0.0452028	0.0703335	0.0239776	0.0365321	0.0334283	0.0238647
FA 16:0		22.0614	19.0735	19.3306	18.9429	19.2118	18.6789	18.438	19.243
FA 16:1		13.623	14.2625	15.1296	14.1713	16.7982	16.5367	17.006	16.753
FA 16:2		0.0280978	0.030936	0.0301133	0.0309008	0.0210707	0.0340295	0.0360535	0.0346151
FA 18:0		5.25481	5.44275	5.43226	5.93824	5.76057	4.93939	5.44317	4.99078
FA 18:1		52.1365	54.0287	53.0785	53.8287	50.9757	52.7644	52.1895	52.2054
FA 18:2		2.80715	2.92531	2.88201	3.04842	3.2509	3.19145	3.15106	3.13852
FA 18:3		0.113604	0.10681	0.106663	0.0807255	0.127047	0.13834	0.114822	0.118156
FA 20:1		0.747203	0.709629	0.685914	0.685236	0.616888	0.513786	0.517205	0.49186
FA 20:2		0.297307	0.325092	0.275153	0.285845	0.236815	0.190172	0.22225	0.22615
FA 20:3		0.527839	0.56486	0.507864	0.517991	0.591534	0.596149	0.624276	0.525745
FA 20:4		0.532873	0.562228	0.5448	0.620677	0.710588	0.635973	0.634346	0.644289
FA 20:5		0.045453	0.0430192	0.0305278	0.0329378	0.0581119	0.0662139	0.0711155	0.0471757
FA 22:5		0.175781	0.188441	0.157417	0.17329	0.208209	0.235349	0.195695	0.16883
FA 22:6		0.211434	0.188327	0.174029	0.203261	0.235885	0.239383	0.201554	0.18013
SFA		28.7068	26.0168	26.3522	26.2504	26.1451	24.8214	25.0028	25.4423
MUFA		66.5537	69.0482	68.9393	68.7555	68.4147	69.8515	69.7461	69.4741
PUFA		4.73954	4.93503	4.70858	4.99405	5.44016	5.32706	5.25117	5.08361
Composition (mol%) in PE
		NT siRNA				ACSL1 siRNA
FA 16:0		0.111727	0.0876099	0.147357	0.0859628	0.0884965	0.11931	0.111029	0.0805744
FA 16:1		10.9135	9.63951	10.7991	10.472	9.62833	11.6331	11.4631	8.2296
FA 18:0		9.33579	9.42761	9.63432	8.23735	10.4325	11.2913	11.116	11.5603
FA 18:1		9.21599	8.86669	8.8359	9.38211	9.67069	9.91248	9.86022	9.99943
FA 18:2		61.0355	62.495	61.3759	62.6857	59.7928	57.5119	57.7634	60.1225
FA 18:3		2.67288	2.64183	2.41213	2.55924	2.89167	2.76174	2.98557	2.76761
FA 20:0		0.0243797	0.0419505	0.0492157	0.0454791	0.036947	0.0277	0.0474451	0.0668145
FA 20:1		0.048	0.0205243	0.0416911	0.00715768	0.0375451	0.038705	0.00542862	0.0266718
FA 20:2		0.832429	0.842735	0.765117	0.836681	0.75082	0.7867	0.683032	0.685396
FA 20:3		0.422616	0.375402	0.416274	0.315125	0.372152	0.287882	0.343222	0.369567
FA 20:4		1.37396	1.55332	1.53063	1.51039	1.44037	1.467	1.29429	1.52552
FA 20:5		3.01929	3.07005	3.05472	2.98375	3.64151	3.1376	3.16802	3.55443
FA 22:5		0.201911	0.155918	0.124491	0.156633	0.213229	0.187863	0.211182	0.131283
FA 22:6		0.404817	0.374955	0.393009	0.450457	0.529022	0.398577	0.462376	0.483212
		0.387168	0.40693	0.420143	0.271983	0.473946	0.438081	0.485666	0.397119
SFA
MUFA		20.2892	18.6143	19.8241	19.9472	19.4251	21.7036	21.4398	18.3363
PUFA		71.2037	72.7653	71.7753	71.7597	70.9761	69.5899	69.5624	72.3682
		8.50702	8.62036	8.40062	8.29306	9.59885	8.70644	8.99777	9.29556
		NT siRNA				ACSL1 siRNA
PC/PE		1.9805	1.93663	1.9765	1.95682	1.96288	1.85476	1.93935	1.89386
