# Supplementary material for: Evolutionarily conserved long-chain Acyl-CoA synthetases regulate membrane composition and fluidity
Source: eLife. 2019 Nov 26;8:e47733. doi: 10.7554/eLife.47733 (PMC6901333; doi:10.7554/eLife.47733)
Supplement: Figure 6—figure supplement 2—source data 4. [file elife-47733-fig6-figsupp2-data4.xlsx]

## Sheet: Fig_6_Fig_Suppl_2C
Lipidomics data used in Figure 6 – figure supplement 2C. Lipidomics of HEK293 under basal conditions
Composition (mol%) in LPC
		NT siRNA				ACSL1 siRNA
LPC 16:0		8.64258	9.62781	9.65573	9.24157	9.56856	7.65714	7.3492	8.67107
LPC 16:1		20.7145	21.0527	21.2974	20.9098	24.6765	26.8217	26.5632	26.9249
LPC 18:0		2.83311	2.31865	1.89323	2.58492	2.79588	2.00703	1.92006	2.2445
LPC 18:1		53.3352	54.4483	54.7401	53.7634	46.45	49.2444	49.2595	47.4798
LPC 18:2		4.47204	4.81485	4.43232	4.31362	4.78313	5.22523	5.23137	5.37934
LPC 20:1		5.00582	2.71248	2.81896	4.25766	5.17443	3.24273	4.08003	3.24331
LPC 20:2		0.86497	0.650133	0.769793	0.740813	0.931175	0.721664	0.79619	0.77399
LPC 20:3		1.12437	1.11071	1.03403	0.870914	1.22544	1.07656	1.09988	1.17636
LPC 20:4		1.48826	1.79559	1.80375	1.63362	2.18176	1.97493	1.98055	2.24714
LPC 22:5		0.670031	0.427465	0.56839	0.593411	0.829499	0.663528	0.541956	0.582364
LPC 22:6		0.849096	1.04135	0.986327	1.09024	1.38367	1.3651	1.178	1.27715
SFA		11.4757	11.9465	11.549	11.8265	12.3644	9.66417	9.26926	10.9156
MUFA		79.0555	78.2134	78.8564	78.9309	76.3009	79.3088	79.9028	77.6481
PUFA		9.46877	9.8401	9.5946	9.24263	11.3347	11.027	10.8279	11.4363
LPC/PC		0.114818	0.120667	0.108659	0.118829	0.109654	0.111567	0.109644	0.112319
