# Supplementary material for: Evolutionarily conserved long-chain Acyl-CoA synthetases regulate membrane composition and fluidity
Source: eLife. 2019 Nov 26;8:e47733. doi: 10.7554/eLife.47733 (PMC6901333; doi:10.7554/eLife.47733)
Supplement: Figure 6—figure supplement 2—source data 5. [file elife-47733-fig6-figsupp2-data5.xlsx]

## Sheet: Fig_6_Fig_Suppl_2D
Lipidomics data used in Figure 6 – figure supplement 2D. Lipidomics of HEK293 under basal conditions
Composition (mol%) in TAG
		NT siRNA				ACSL1 siRNA
FA 14:0		2.75202	2.54319	2.75218	2.88905	2.34696	2.54913	2.50198	2.38052
FA 16:0		37.3054	36.0206	37.1619	38.5004	38.4266	38.1529	38.1684	36.3753
FA 16:1		7.1815	8.38876	7.54238	7.17751	9.41275	9.78214	10.297	10.2253
FA 18:0		12.3556	12.0649	12.1107	12.71	9.87548	10.3852	9.92852	9.85955
FA 18:1		37.2442	36.307	36.9501	35.5169	36.6207	35.9728	36.0118	36.9367
FA 18:2		1.52639	2.58072	2.15583	1.81945	2.05595	1.89455	1.83489	2.74726
FA 20:3		0.537924	0.934082	0.295692	0.302605	0.343217	0.339612	0.390631	0.355547
FA 20:4		0.155754	0.252571	0.201202	0.164416	0.19655	0.187057	0.144333	0.272476
FA 20:5		0.215015	0.274305	0.22047	0.306548	0.168266	0.191862	0.248315	0.277088
FA 22:5		0.164483	0.321123	0.297201	0.256431	0.276009	0.247278	0.259694	0.339946
FA 22:6		0.561714	0.312702	0.31235	0.356662	0.277446	0.297522	0.214382	0.230365
SFA		52.4131	50.6287	52.0248	54.0995	50.6491	51.0872	50.5989	48.6153
MUFA		44.4257	44.6958	44.4925	42.6944	46.0335	45.7549	46.3088	47.162
PUFA		3.16128	4.6755	3.48274	3.20611	3.31744	3.15788	3.09225	4.22268
TAG/PC		0.0545264	0.0582168	0.0520627	0.0540828	0.0640405	0.0702354	0.0689961	0.0760433
