# Supplementary material for: Evolutionarily conserved long-chain Acyl-CoA synthetases regulate membrane composition and fluidity
Source: eLife. 2019 Nov 26;8:e47733. doi: 10.7554/eLife.47733 (PMC6901333; doi:10.7554/eLife.47733)
Supplement: Figure 6—figure supplement 2—source data 6. [file elife-47733-fig6-figsupp2-data6.xlsx]

## Sheet: Fig_6_Fig_Suppl_2F
Lipidomics data used in Figure 6 – figure supplement 2F. Lipidomics of HEK293 under basal conditions
Note that for the Fig6.Sup.2F panel the data was normalized to the control treatment (NT siRNA) -> %
Cholesterol (pmol) / PC (nmol)
		NT siRNA				ACSL1 siRNA
Cholesterol /PC		1.75529	1.90114	2.05687	1.89367	1.84495	1.71574	1.63802	1.76219
