# Supplementary material for: Evolutionarily conserved long-chain Acyl-CoA synthetases regulate membrane composition and fluidity
Source: eLife. 2019 Nov 26;8:e47733. doi: 10.7554/eLife.47733 (PMC6901333; doi:10.7554/eLife.47733)
Supplement: Figure 6—figure supplement 2—source data 7. [file elife-47733-fig6-figsupp2-data7.xlsx]

## Sheet: Fig_6_Fig_Suppl_2G-K
Lipidomics data used in Figure 6 – figure supplement 2G-K. Lipidomics of HEK293 under basal conditions
Sphingolipids
		NT siRNA				ACSL1 siRNA
Sphingomyelin		0.234461	0.287628	0.30794	0.258141	0.308826	0.279652	0.269179	0.270401
Cer *1000/ PC		17.48	22.5877	28.2235	22.0105	26.9236	24.539	19.0784	22.3073
DiCer *1000/ PC		0.396419	0.534651	0.673457	0.469496	0.45459	0.422602	0.343235	0.404397
GluCer *1000/ PC		50.6162	65.7917	74.8853	61.7036	43.1462	44.1151	35.2939	40.2084
LacCer *1000/ PC		11.7961	13.7363	16.6942	13.7549	17.0678	15.2515	14.0129	14.3741
