# Supplementary material for: Evolutionarily conserved long-chain Acyl-CoA synthetases regulate membrane composition and fluidity
Source: eLife. 2019 Nov 26;8:e47733. doi: 10.7554/eLife.47733 (PMC6901333; doi:10.7554/eLife.47733)
Supplement: Figure 6—source data 1. [file elife-47733-fig6-data1.xlsx]

## Sheet: Fig_6A and D
Lipidomics data used in figure 6A and 6D. Lipidomics of HEK293 treated with 400 uM PA
Note that for the heat map, the data was normalized to the control treatment (NT siRNA)
Composition (mol%) in PC
		NT siRNA			ACSL1 siRNA
FA 14:0		0.722	0.791	0.66	0.566	0.559	0.579
FA 14:1		0.031	0.039	0.032	0.021	0.014	0.017
FA 16:0		33.816	38.905	34.756	38.027	36.316	34.663
FA 16:1		24.505	21.507	24.01	23.651	24.34	26.408
FA 16:2		0.085	0.008	0.084	0.004	0.086	0.077
FA 18:0		4.631	4.691	4.625	4.952	4.541	4.998
FA 18:1		32.749	30.081	32.248	28.175	29.486	28.918
FA 18:2		1.747	2.004	1.841	2.299	2.454	2.15
FA 18:3		0.083	0.076	0.076	0.089	0.087	0.095
FA 20:1		0.302	0.33	0.298	0.294	0.28	0.283
FA 20:2		0.117	0.136	0.123	0.104	0.104	0.106
FA 20:3		0.372	0.469	0.396	0.471	0.471	0.459
FA 20:4		0.477	0.547	0.502	0.77	0.739	0.723
FA 20:5		0.057	0.075	0.058	0.098	0.097	0.103
FA 22:5		0.159	0.163	0.143	0.243	0.225	0.201
FA 22:6		0.148	0.178	0.149	0.234	0.201	0.222
SFA		39.169	44.387	40.041	43.545	41.416	40.24
MUFA		57.586	51.957	56.588	52.141	54.12	55.626
PUFA		3.245	3.657	3.371	4.314	4.464	4.134
Composition (mol%) in PE
		NT siRNA			ACSL1 siRNA
FA 16:0		19.976	18.816	19.84	18.589	17.829	19.012
FA 16:1		19.365	17.935	19.304	18.193	17.936	18.934
FA 18:0		8.172	8.85	8.261	10.009	10.149	9.821
FA 18:1		44.562	45.918	44.678	43.119	44.09	42.524
FA 18:2		2.282	2.219	2.254	2.661	2.751	2.757
FA 18:3		0.02	0.022	0.029	0.014	0.015	0.024
FA 20:0		0.028	0.03	0.021	0.026	0.019	0.028
FA 20:1		0.41	0.455	0.418	0.481	0.437	0.424
FA 20:2		0.203	0.222	0.222	0.22	0.205	0.204
FA 20:3		0.957	1.057	0.94	1.252	1.233	1.162
FA 20:4		2.872	3.196	2.79	3.701	3.609	3.61
FA 20:5		0.212	0.231	0.218	0.258	0.244	0.233
FA 22:5		0.526	0.588	0.583	0.814	0.795	0.692
FA 22:6		0.416	0.46	0.443	0.664	0.686	0.576
SFA		28.176	27.696	28.122	28.624	27.998	28.86
MUFA		64.337	64.307	64.399	61.793	62.464	61.882
PUFA		7.486	7.997	7.479	9.584	9.538	9.258
		NT siRNA			ACSL1 siRNA
PC/PE		3.71112	3.3852	3.47834	3.38952	3.28257	3.79298
