# Supplementary material for: Evolutionarily conserved long-chain Acyl-CoA synthetases regulate membrane composition and fluidity
Source: eLife. 2019 Nov 26;8:e47733. doi: 10.7554/eLife.47733 (PMC6901333; doi:10.7554/eLife.47733)
Supplement: Figure 6—source data 2. [file elife-47733-fig6-data2.xlsx]

## Sheet: Fig_6B
Lipidomics data used in figure 6B. Lipidomics of HEK293 treated with 400 uM PA
Composition (mol%) in LPC
		NT siRNA				ACSL1 siRNA
LPC 16:0		54.8967	54.6154	52.1027	54.1064	53.8493	51.5725	51.3806	49.382
LPC 16:1		15.0044	15.6751	13.5062	15.6219	21.411	19.3997	20.5663	23.7193
LPC 18:0		11.0888	10.8658	14.0917	11.0587	6.32226	7.38423	6.75252	6.3889
LPC 18:1		13.0194	13.3521	13.6447	13.4737	12.5483	13.8136	14.0413	14.0002
LPC 18:2		1.39358	1.40986	1.40165	1.51687	1.66129	1.39183	1.65039	1.85374
LPC 20:1		1.86793	1.48129	2.57254	1.3928	1.19988	3.08251	2.57097	1.63047
LPC 20:2		0.270114	0.260825	0.361368	0.263301	0.264317	0.400871	0.412838	0.304191
LPC 20:3		0.485467	0.459194	0.456997	0.504903	0.580431	0.533673	0.443637	0.554998
LPC 20:4		1.12064	1.0372	0.940886	1.20045	1.25408	1.29563	1.17673	1.17349
LPC 22:5		0.343072	0.332048	0.441585	0.293775	0.311756	0.513858	0.434726	0.397648
LPC 22:6		0.509895	0.511249	0.479637	0.567232	0.59741	0.611546	0.569955	0.595098
SFA		65.9855	65.4812	66.1945	65.1651	60.1715	58.9568	58.1331	55.7709
MUFA		29.8917	30.5084	29.7234	30.4883	35.1592	36.2958	37.1786	39.3499
PUFA		4.12277	4.01037	4.08213	4.34653	4.66928	4.74741	4.68828	4.87916
LPC/PC		0.1476	0.143679	0.164412	0.139983	0.126057	0.168112	0.143778	0.140988
