# Supplementary material for: Evolutionarily conserved long-chain Acyl-CoA synthetases regulate membrane composition and fluidity
Source: eLife. 2019 Nov 26;8:e47733. doi: 10.7554/eLife.47733 (PMC6901333; doi:10.7554/eLife.47733)
Supplement: Figure 6—source data 3. [file elife-47733-fig6-data3.xlsx]

## Sheet: Fig_6C
Lipidomics data used in figure 6C. Lipidomics of HEK293 treated with 400 uM PA
Composition (mol%) in TAG
		NT siRNA			ACSL1 siRNA
FA 14:0		3.24	3.4	3.26	3.66	3.54	3.76
FA 16:0		27.09	28.49	27.83	30.31	29.23	30.3
FA 16:1		10.85	8.88	10.04	8.89	8.43	7.8
FA 18:0		8.44	9.36	8.48	9.15	9.08	9.32
FA 18:1		43.38	45.11	44.2	42.62	42.75	43.78
FA 18:2		4.21	2.62	3.46	2.91	4.37	2.63
FA 20:3		0.77	0.55	0.72	0.53	0.56	0.57
FA 20:4		0.56	0.38	0.56	0.45	0.47	0.37
FA 20:5		0.18	0.08	0.21	0.13	0.19	0.11
FA 22:5		0.41	0.27	0.36	0.31	0.36	0.32
FA 22:6		0.87	0.86	0.86	1.03	1.03	1.04
SFA		38.78	41.25	39.57	43.12	41.85	43.39
MUFA		54.23	53.99	54.24	51.52	51.18	51.58
PUFA		6.99	4.76	6.18	5.36	6.97	5.03
TAG/PC		0.0064	0.0085	0.005	0.0104	0.0099	0.0077
