# Supplementary material for: Evolutionarily conserved long-chain Acyl-CoA synthetases regulate membrane composition and fluidity
Source: eLife. 2019 Nov 26;8:e47733. doi: 10.7554/eLife.47733 (PMC6901333; doi:10.7554/eLife.47733)
Supplement: Figure 6—source data 4. [file elife-47733-fig6-data4.xlsx]

## Sheet: Fig_6E
Lipidomics data used in figure 6E. Lipidomics of HEK293 treated with 400 uM PA
Note that for the Figure 6E panel the data was normalized to the control treatment (NT siRNA) -> %
Cholesterol (pmol) / PC (nmol)
		NT siRNA				ACSL1 siRNA
Cholesterol /PC		1.68951	1.74961	1.49993	1.62616	1.57511	1.37257	1.68778	1.70351
