# Supplementary material for: Evolutionarily conserved long-chain Acyl-CoA synthetases regulate membrane composition and fluidity
Source: eLife. 2019 Nov 26;8:e47733. doi: 10.7554/eLife.47733 (PMC6901333; doi:10.7554/eLife.47733)
Supplement: Figure 7—figure supplement 1—source data 1. [file elife-47733-fig7-figsupp1-data1.xlsx]

## Sheet: Fig_7_Fig_Suppl_1C
Lipidomics data used in Figure 7 – figure supplement 1C. Lipidomics of HEK293 treated with 400 uM PA
Composition (mol%) in CL
		NT siRNA			ACSL1 siRNA
FA 16:0		1.4609	1.45351	2.47939	2.76299	3.01113	3.48489
FA 16:1		35.465	36.359	33.5584	35.0636	34.22	34.7452
FA 18:1		56.1729	55.8027	56.7662	54.3878	55.2755	54.3671
FA 18:2		6.90117	6.3848	7.19604	7.78565	7.49335	7.40286
