# Supplementary material for: Evolutionarily conserved long-chain Acyl-CoA synthetases regulate membrane composition and fluidity
Source: eLife. 2019 Nov 26;8:e47733. doi: 10.7554/eLife.47733 (PMC6901333; doi:10.7554/eLife.47733)
Supplement: Figure 7—source data 1. [file elife-47733-fig7-data1.xlsx]

## Sheet: Fig_7C
Lipidomics data used in Figure 7C. Lipidomics of HEK293 treated with 400 uM PA
AC16:0 (pmol) / PC (pmol)
		NT siRNA				ACSL1 siRNA
AC16:0 /PC		1.46554e-05	1.23827e-05	1.33602e-05	1.12789e-05	2.50112e-05	1.92437e-05	3.25767e-05	1.58348e-05
